# Supplementary material for: Insights into the functional mechanisms of three terpene synthases from Lavandula angustifolia (Lavender)
Source: PubMed Central journal article supplement (PMC11649398; doi:10.3389/fpls.2024.1497345), 2024-12-03
Supplement: DataSheet1.pdf [file DataSheet1.pdf]

# Supplementary Material

## Insights into the functional mechanisms of three terpene synthases from *Lavandula angustifolia* (Lavender)

Dafeng Liu<sup>1,2,\*</sup>, Hongying Song<sup>2</sup>, Huashui Deng<sup>2</sup>, Ablikim Abdiriyim<sup>1</sup>, Lvxia Zhang<sup>1</sup>,  
Ziwei Jiao<sup>1</sup>, Xueru Li<sup>1</sup>, Lu Liu<sup>1</sup> and Shuangqin Bai<sup>1</sup>

<sup>1</sup>Xinjiang Key Laboratory of Lavender Conservation and Utilization, College of Biological Sciences and Technology, Yili Normal University, Yining 835000, Xinjiang, China;

<sup>2</sup>School of Life Sciences, Xiamen University, Xiamen 361102, Fujian, China.

\*Correspondence: [dafeli@sina.cn](mailto:dafeli@sina.cn) or [liudafeng2017@163.com](mailto:liudafeng2017@163.com)

## CONTENTS

|                         |     |
|-------------------------|-----|
| <b>Table S1.</b> .....  | S3  |
| <b>Table S2.</b> .....  | S4  |
| <b>Table S3.</b> .....  | S5  |
| <b>Table S4.</b> .....  | S6  |
| <b>Table S5.</b> .....  | S7  |
| <b>Table S6.</b> .....  | S8  |
| <b>Table S7.</b> .....  | S9  |
| <b>Figure S1.</b> ..... | S10 |
| <b>Figure S2.</b> ..... | S12 |
| <b>Figure S3.</b> ..... | S13 |
| <b>Figure S4.</b> ..... | S14 |
| <b>Figure S5.</b> ..... | S15 |
| <b>Figure S6.</b> ..... | S16 |
| <b>Figure S7.</b> ..... | S17 |
| <b>Figure S8.</b> ..... | S18 |
| <b>Figure S9.</b> ..... | S19 |

**Table S1.****Table S1. Primers used for RT-qPCR in this study**

| Genes             | Primers        | Primer sequence (5'-3')                   |
|-------------------|----------------|-------------------------------------------|
| <i>Beta-actin</i> | Forward primer | ggcagtttgacaagagaagacacagtcacc            |
|                   | Reverse primer | tttttgattaaaaaaaaaagctgaaatcataatattttaat |
| <i>LaLINS</i>     | Forward primer | atgtcgatcaatatcaacatgcctgcagcc            |
|                   | Reverse primer | tcatgcgtacggctcgaacagcatg                 |
| <i>LaLIMS</i>     | Forward primer | atgtctatcattagcatgcatgtgggaatccttaataggc  |
|                   | Reverse primer | ttagggatatggctcgaacatcagggtcca            |
| <i>LaBERS</i>     | Forward primer | atggaggcgagaaggtcgggg                     |
|                   | Reverse primer | tcatggcatatggaagggtagaacaatgagtgcac       |

**Table S2.**

**Table S2. Search for structural homologs of LaLINS using SWISS-MODEL**

| Rank | PDB code | GMQE | Identity (%) | Method       | Oligo State | Ligands            | Description                                                                                                                                                                                            |
|------|----------|------|--------------|--------------|-------------|--------------------|--------------------------------------------------------------------------------------------------------------------------------------------------------------------------------------------------------|
| 1    | 1n1z     | 0.87 | 64.56        | X-ray, 2.3 Å | homo-dimer  | 6xMG, 2xBTB, 2xPOP | (+)-bornyl diphosphate synthase; (+)-Bornyl Diphosphate Synthase: Complex with Mg and pyrophosphate from <i>Salvia officinalis</i>                                                                     |
| 2    | 5c05     | 0.82 | 58.16        | X-ray, 1.6 Å | homo-dimer  | None               | Putative gamma-terpinene synthase; Crystal Structure of Gamma-terpinene Synthase from <i>Thymus vulgaris</i>                                                                                           |
| 3    | 2j5c     | 0.74 | 54.37        | X-ray, 2.0 Å | monomer     | None               | 1,8-CINEOLE SYNTHASE; Rational conversion of substrate and product specificity in a monoterpene synthase. Structural insights into the molecular basis of rapid evolution from <i>Salvia fruticosa</i> |
| 4    | 2onh     | 0.76 | 51.87        | X-ray, 2.7 Å | homo-dimer  | 6xMN, 2xFPG, 4xBTB | 4S-limonene synthase; Crystal Structure of limonene synthase with 2-fluorogeranyl diphosphate (FGPP) from <i>Mentha spicata</i>                                                                        |
| 5    | 5uv0     | 0.76 | 45.76        | X-ray, 2.3 Å | monomer     | None               | (+)-limonene synthase; Crystal Structure of (+)-Limonene Synthase from <i>Citrus sinensis</i>                                                                                                          |

**Table S3.****Table S3. Search for structural homologs of LaLIMS using SWISS-MODEL**

| Rank | PDB code | GMQE | Identity (%) | Method       | Oligo State | Ligands            | Description                                                                                                                                                                                            |
|------|----------|------|--------------|--------------|-------------|--------------------|--------------------------------------------------------------------------------------------------------------------------------------------------------------------------------------------------------|
| 1    | 1n1z     | 0.84 | 65.81        | X-ray, 2.3 Å | homo-dimer  | 6xMG, 2xBTB, 2xPOP | (+)-bornyl diphosphate synthase; (+)-Bornyl Diphosphate Synthase: Complex with Mg and pyrophosphate from <i>Salvia officinalis</i>                                                                     |
| 2    | 5c05     | 0.79 | 60.29        | X-ray, 1.6 Å | homo-dimer  | None               | Putative gamma-terpinene synthase; Crystal Structure of Gamma-terpinene Synthase from <i>Thymus vulgaris</i>                                                                                           |
| 3    | 2j5c     | 0.72 | 55.83        | X-ray, 2.0 Å | monomer     | None               | 1,8-CINEOLE SYNTHASE; Rational conversion of substrate and product specificity in a monoterpene synthase. Structural insights into the molecular basis of rapid evolution from <i>Salvia fruticosa</i> |
| 4    | 2onh     | 0.74 | 53.06        | X-ray, 2.7 Å | homo-dimer  | 6xMN, 2xF3P, 1xBTB | 4S-limonene synthase; Crystal Structure of limonene synthase with 2-fluorolinalyl diphosphate (FLPP) from <i>Mentha spicata</i>                                                                        |
| 5    | 5uv0     | 0.72 | 46.88        | X-ray, 2.3 Å | monomer     | None               | (+)-limonene synthase; Crystal Structure of (+)-Limonene Synthase from <i>Citrus sinensis</i>                                                                                                          |

**Table S4.**

**Table S4. Search for structural homologs of LaBERS using SWISS-MODEL**

| Rank | PDB code | GMQE | Identity (%) | Method       | Oligo State | Ligands            | Description                                                                                                                                                                                              |
|------|----------|------|--------------|--------------|-------------|--------------------|----------------------------------------------------------------------------------------------------------------------------------------------------------------------------------------------------------|
| 1    | 5uv0     | 0.81 | 48.58        | X-ray, 2.3 Å | monomer     | None               | (+)-limonene synthase<br>Crystal Structure of (+)-Limonene Synthase from <i>Citrus sinensis</i>                                                                                                          |
| 2    | 2j5c     | 0.75 | 45.37        | X-ray, 2.0 Å | monomer     | None               | 1,8-CINEOLE SYNTHASE<br>Rational conversion of substrate and product specificity in a monoterpene synthase. Structural insights into the molecular basis of rapid evolution from <i>Salvia fruticosa</i> |
| 3    | 2onh     | 0.78 | 44.92        | X-ray, 2.7 Å | homo-dimer  | 6xMN, 2xF3P, 1xBTB | 4S-limonene synthase;<br>Crystal Structure of limonene synthase with 2-fluorolinalyl diphosphate (FLPP) from <i>Mentha spicata</i>                                                                       |
| 4    | 3n0f     | 0.79 | 44.38        | X-ray, 2.7 Å | monomer     | None               | Isoprene synthase;<br>Crystal Structure of Isoprene Synthase from <i>Grey Poplar Leaves (Populus x canescens)</i>                                                                                        |
| 5    | 6o9p     | 0.77 | 42.96        | X-ray, 2.1 Å | monomer     | 1xBFQ, 2xMG        | Sesquisabinene B synthase 1; Wild-type SaSQS1 Complexed with Ibandronate from <i>Santalum album</i>                                                                                                      |

## Table S5.

**Table S5. Primers used for generating site-directed mutants of LaLINS**

| Primers   | Primer sequence (5'-3')                                  |
|-----------|----------------------------------------------------------|
| R283A (F) | catttg <b><u>GCA</u></b> gataggcttggaagctactttg          |
| R283A (R) | gcctat <b><u>TGC</u></b> cacaaatgggagttttcagctagg        |
| D320A (F) | catctta <b><u>GCA</u></b> gatgtttacgatctatggcacgtag      |
| D320A (R) | gtaaacat <b><u>TGC</u></b> taaagatgtgattagggttatgatcttgg |
| D324A (F) | gatgtttac <b><u>GCA</u></b> atctatggcacgtagatgaattg      |
| D324A (R) | ccatagat <b><u>TGC</u></b> gtaaacatcgtctaaagatgtgattagg  |
| R461A (F) | gctcgt <b><u>GCA</u></b> ctccgatgacctaggaaca             |
| R461A (R) | cgggaag <b><u>TGC</u></b> cacgagcattcccgaac              |
| T468A (F) | cctagga <b><u>GCA</u></b> tcatcgttcgagatggagag           |
| T468A (R) | cgatga <b><u>TGC</u></b> tcctaggtcatcgggaagc             |

Note: Mutagenic regions of the sequence are shown in underlined and bold.

## Table S6.

**Table S6. Primers used for generating site-directed mutants of LaLIMS**

| Primers   | Primer sequence (5'-3')                                |
|-----------|--------------------------------------------------------|
| R319A (F) | cattcgcg <b><u>GCA</u></b> gatcgggttggtgagtc           |
| R319A (R) | cccgatc <b><u>TGC</u></b> cgcggaatgggagttttc           |
| D356A (F) | gttgta <b><u>GCA</u></b> gatgtttacgatgtatatggtacg      |
| D356A (R) | gtaaaccatc <b><u>TGC</u></b> tacaactgttgctagagcaataatc |
| D360A (F) | gtttac <b><u>GCA</u></b> gtatatggtacgttagaggaactg      |
| D360A (R) | ccatatac <b><u>TGC</u></b> gtaaaccatcatctacaactgttgc   |
| R497A (F) | gcttcta <b><u>GCA</u></b> cttctgatgatctaggaacag        |
| R497A (R) | caggaag <b><u>TGC</u></b> tagaagcattcctgagagg          |
| T504A (F) | gatctagga <b><u>GCA</u></b> gcatcgtttgagttgaagag       |
| T504A (R) | cgatgc <b><u>TGC</u></b> tcctagatcatcaggaagcc          |

Note: Mutagenic regions of the sequence are shown in underlined and bold.



## Table S7.

**Table S7. Primers used for generating site-directed mutants of LaBERS**

| Primers   | Primer sequence (5'-3')                                 |
|-----------|---------------------------------------------------------|
| R254A (F) | gtttgcc <b><u>GCA</u></b> caccgattggcagag               |
| R254A (R) | caatcggtg <b><u>TGC</u></b> ggcaaaactcatcttttcg         |
| D291A (F) | cgataaca <b><u>GCA</u></b> gacatatacgacatttatggagc      |
| D291A (R) | gtatatgtc <b><u>TGC</u></b> tgttatcgttaattagcactgcaatc  |
| D295A (F) | catatac <b><u>GCA</u></b> atttatggagcgttagaagaac        |
| D295A (R) | ccataaat <b><u>TGC</u></b> gtatatgtcatctgttatcgttaattag |
| R432A (F) | ggttctt <b><u>GCA</u></b> cttgcatgatttgggaac            |
| R432A (R) | ctgcaag <b><u>TGC</u></b> aagaacctggatggccaac           |
| T439A (F) | gatttggga <b><u>GCA</u></b> tcatcagaagaatcaaaagagg      |
| T439A (R) | ctgatga <b><u>TGC</u></b> cccaaatcatctgcaag             |

Note: Mutagenic regions of the sequence are shown in underlined and bold.



**Figure S1. Sequence alignments of terpene synthases.** The ClustalW default color scheme is employed, wherein conserved amino acids are depicted with more intense colors compared to non-conserved ones. The alignment includes the following reference proteins: Q2XSC5, *Lavandula angustifolia* (Lavender); Q8H2B4, *Mentha aquatica* (Water mint); Q2XSC6, *Lavandula angustifolia* (Lavender); R4YXW8, *Coffea arabica* (Arabian coffee); Q1XBU5, *Solanum lycopersicum* (Tomato, *Lycopersicon esculentum*); Q2XSC4, *Lavandula angustifolia* (Lavender); J7LQ09, *Phyla dulcis* (Aztec sweet herb, *Lippia dulcis*); A0A1C9J6A7, *Citrus sinensis* (Sweet orange, *Citrus aurantium* var. *sinensis*); Q9SPN1, *Artemisia annua* (Sweet wormwood); Q9SPN0, *Artemisia annua* (Sweet wormwood); A7IZZ1, *Cannabis sativa* (Hemp, Marijuana); Q5SBP3, *Ocimum basilicum* (Sweet basil); F2XFA6, *Picea sitchensis* (Sitka spruce, *Pinus sitchensis*); F2XF93, *Picea glauca* (White spruce, *Pinus glauca*).



Figure S2.

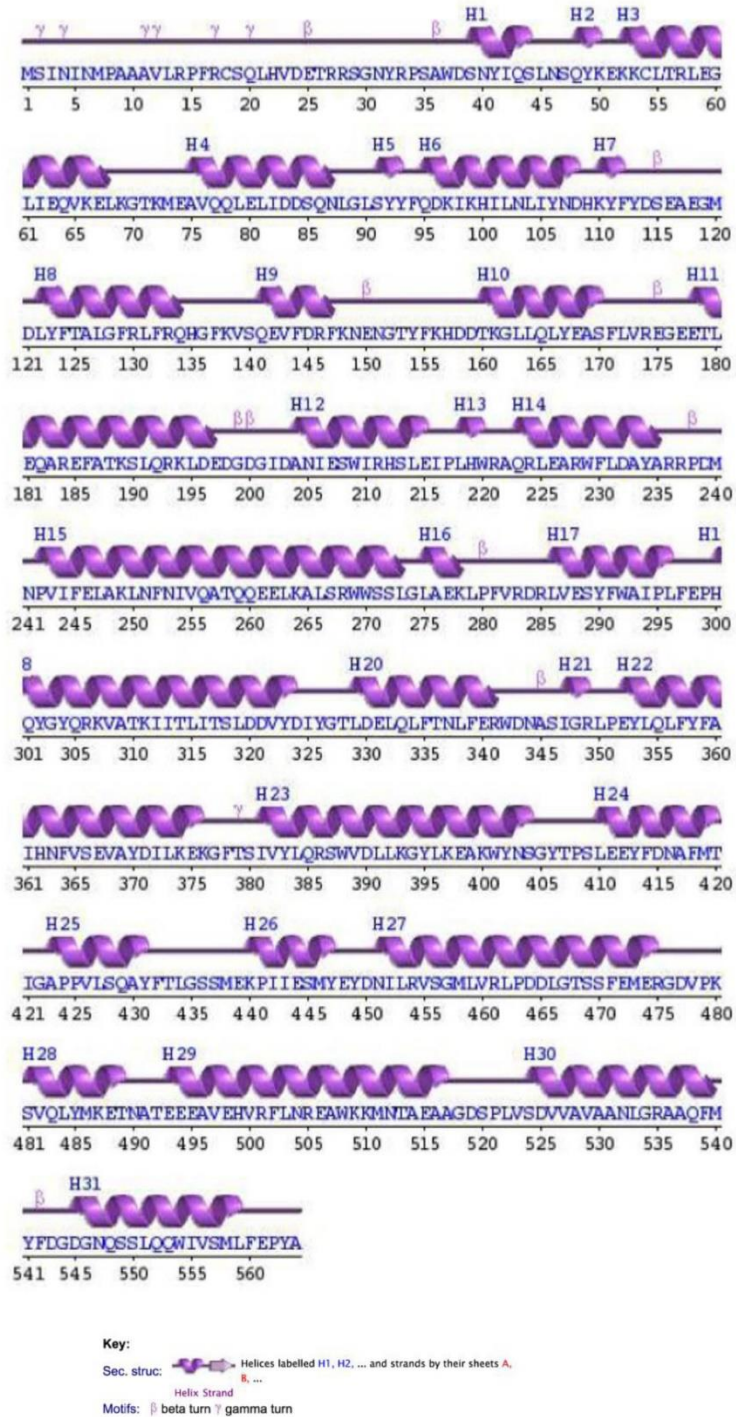

Figure S2. Secondary structure of LaLINS.

Figure S3.

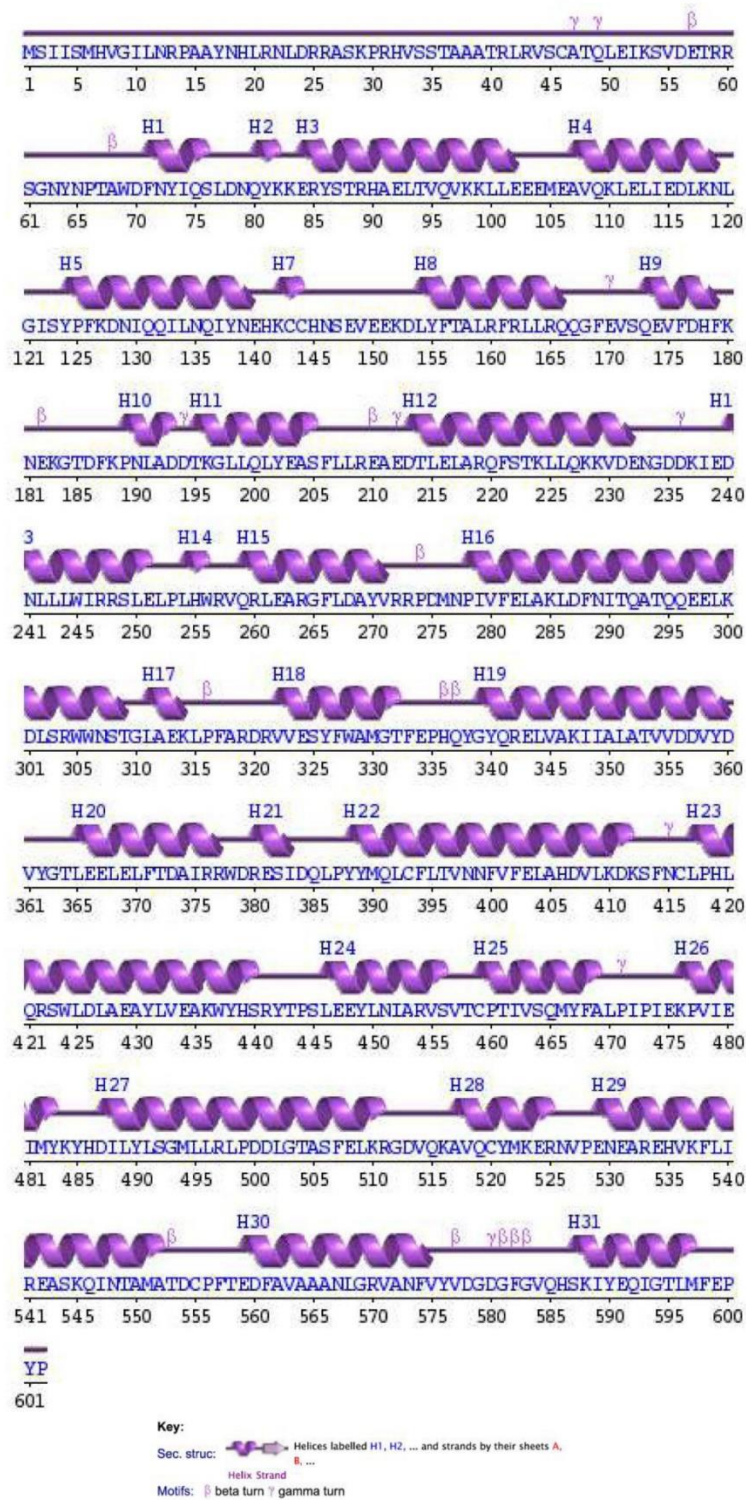

Figure S3. Secondary structure of LaLIMS.

Figure S4.

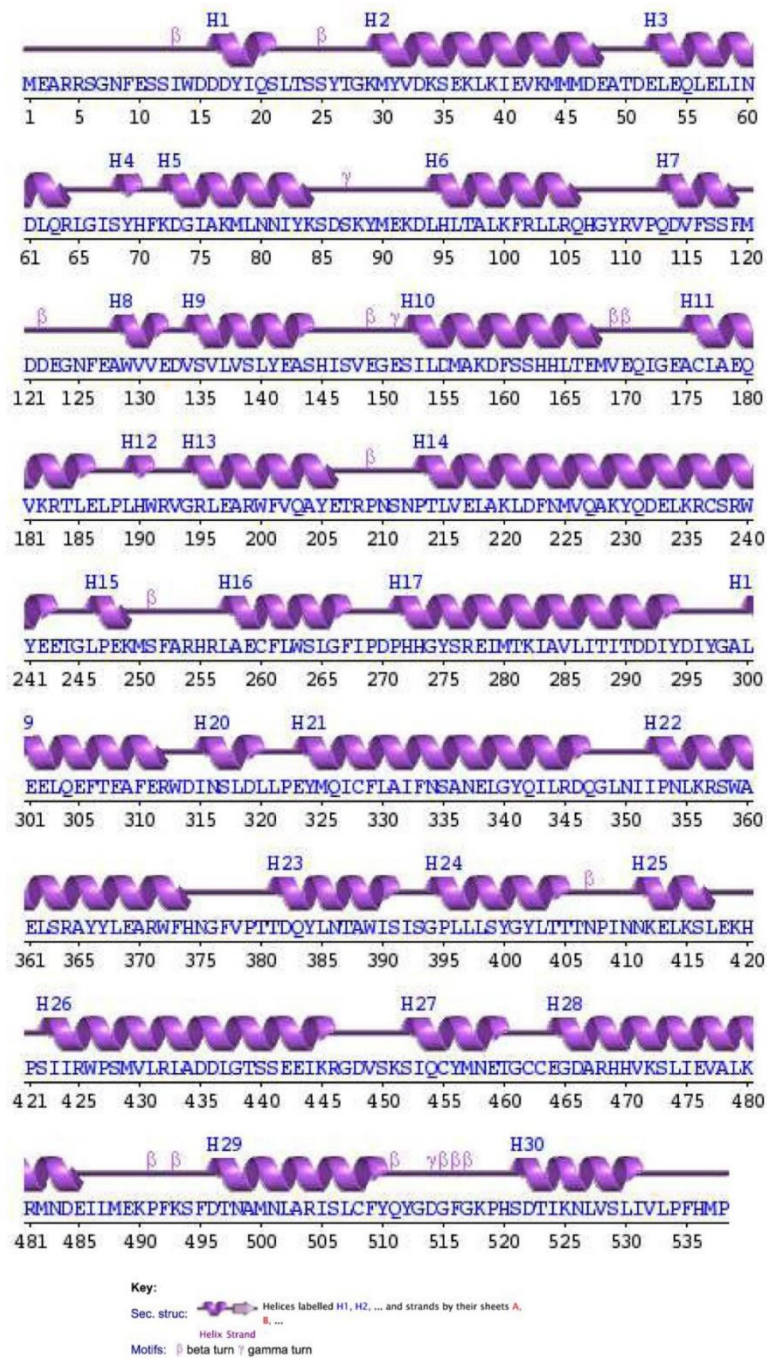

Figure S4. Secondary structure of LaBERS.



Figure S5.

**(a)** LaLINS

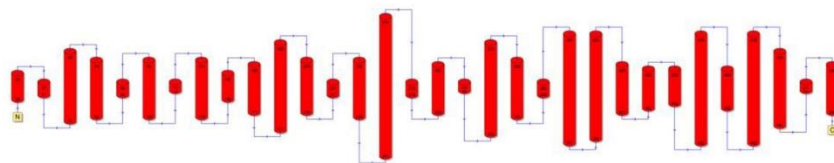

**(b)** LaLIMS

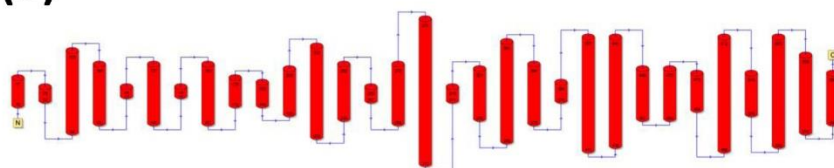

**(c)** LaBERS

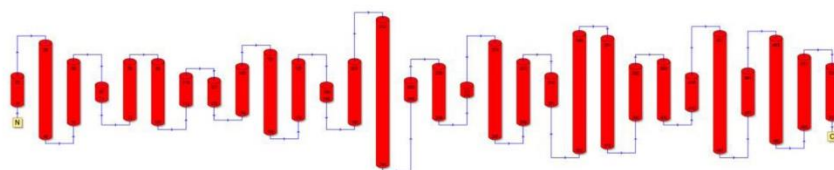

Figure S5. Secondary structure of the three terpene synthases.

## Figure S6.

atgtcgatcaatatcaacatgcctgcagccgctctccgccctttcgctgctcacaactacatgtcgatgaaacccgacgctccgaaact  
accgccctcggcttgggattccaactacatccaatctctcaattctcagtataaggaaaagaagtgcttgacaaggctagaaggctgattg  
agcaagtgaaggaaactgaaggggacaaaaatggaggctgtcaacaattggagttgattgatgactcgagaatctgggattatcatattat  
ttcaagataaaattaacatatcttgaattgatataatgatcacaatattttacgatagtgaagctgaaggaatggattgtattttaca  
gctcttggatttagactctttagacaacatggttttaagtctccaagaagtatttgatcgttcaagaacgagaatggtactatttcaagca  
cgacgatacaaagggattgttcagctctacgaagcatctcctagtgcgagaaggcgaagagacactcgaacaagcagagaatttggc  
accaatccctacaaagaaaacttgatgaggatggtgatggaattgacccaatcgaatcatggatccgccaactctctggagatcccact  
tattggagggtcagaggctagaggcgagatggttcttagatgcttatgcgagaaggcccagatgaaccccgttatcttcagcttgctaa  
actcaactcaatattgtccaagcaacacaagaagaattgaaagctctcaggggtggagtagtttaggcctagctgaaaaactcc  
catttgtgagggataggcttggaaagctacttttgggctattccactctttagcctcatcaatggatatcaaagaaaagtgccacca  
gatcataaccctaatacacatctttagacgatgtttacgatctatggcacgtagatgaattgcaactatttacgaactatttgaagatggg  
ataatgcatcaatcggccgacttctgaatactgcaattgttctatttcgcaatccacaacttgtttccgaggtggcttacgacatttcaaag  
aaaaggtttcactagattgtatattacagagatcgtgggtgatttctaaaaggatacctaaaagaggcaagtggtacaatagtgga  
tacacgccaagcctcgaggaatatttcgacaacgcattcatgacaataggggccctccggtactatcgcaagcttatttcattaggaagc  
tcgatggagaaaaccgatcatcgagagcatgtacgaatatgacaacatacttcgcttccgggaatgctctgaggctcccgatgacctagg  
aacatcatcgttcgagatggagagaggcgactgcccgaatcggccagctatacatgaaggaaacaatgctacggaggaggaggcggt  
ggagcacgtgaggttttgaatcgggaggcgtggaagaagatgaacacggcggaggcggccggtgattctcgttagtgagtacgtggtg  
gcggtggcggcaatcttgaagggcgcgagttatgtatttcgacggagatggtaaccagtctagtttgcagcagtggttggatgtgagcatg  
ctgttcgagccgtacgcatga

**Figure S6. Gene sequence of *LaLINS***



**Figure S7.**

atgtctatcattagcatgcatgtggaatccttaataggcctgcagcttataaccatcttcgcaactggacaggagagcttcaaagccgcgcc  
atgtctcttactgcccgcactcgcctccgggttcttgcgccacacaactagaaattaagtcctgatgaaacccgacgctccggaaa  
ctacaaccctaccgcttgggattcaactacatccaatccctcgacaatcagataagaaaagagaggtactcgacaagacacgctgagctga  
ctgtgcaagtgaagaagctgctggaggaagaaatggaagcgggtcaaaagttggaattgattgaggatttgaagaacctgggaatatctta  
cccattaaggacaatatccaacagattttaatcaaatatataatgagcacaatgttgccacaacagtgaagtgaagaaaaggattgt  
atctcagggctcttcgattccgactccttagacaacagggtttgaagtctcaagaagtattgatcattcaagaacgagaagggtacaga  
ttcaagccaaaccttgctgacgatactaaaggactattgcaacttcaagcatcttcttattaagagaagctgaagatacacttgagta  
gctgcacaatcttcaacaaattactgcagaaaaagtcgatgagaatggtgatgataaaatagaggataatctattattatggattcgcgt  
tctttggagctcccgttcattggagggtgcaaaggctagaagcaagagggttcttgatgcttacgtagaaggcccgacatgaatccaatt  
gttttgagctcgcaaacctgacttcaatattaccaagcaacacaagaagaactgaaagatctctcgagggtggaatagtacagg  
ccttccgaaaaactcccattcgcgagggatcgggttgttgagtcctacttctggcaatgggaacctttagcctcatcaataggttatcag  
agagaactgtcgcaagattattgctctagcaacagttgtagatgatgttacgatgtatatggtacgtagaggaactggaactattacag  
atgccattcggagatgggatcgtgaatcaatcgaccaactccttactacatgcagctatgcttttgactgtcaacaacttgtttcgagctg  
ctcatgatgttctaaggataagagtttcaactgcttaccacattacagagatcgtggctagacttggctgaagcatatctgtcgaggctaag  
tggtaccacagtagatatacaccgagcctcgaggaatatctcaatattgcaagagtttcagttacgtgtcccactatagtttcacaaatgtactt  
tgattaccaattccgatagagaaaccggtcatcgagatcatgtacaaataccagacatactttacctcaggaatgcttctaaggcttct  
gatgatcaggaacagcatcgtttgagttgaagagaggtgatgtgcaaaaagcagtcaggttatatgaaggaaagaatgttctgaaaa  
tgaggcacgagaacatgtgaagtttctgattcgggagcgtcgaagcagataaacaccgcatggcgaccgattgtccattactgaagatt  
ttgctgtggctgcagcgaatcttgaagagtgccgaatcttgtgtacgtcgcgagatggtttggcgtgcaacactcaaaaatataatgaac  
agattggaacctgatgttcgagccatatccctaa

**Figure S7. Gene sequence of *LaLIMS***

## Figure S8.

atggaggcgagaaggtcggggaatttcgagtcagcatctgggacgacgattacattcagtcctaacgagttcatatacgggtaaaatgta  
cgtagataaatctgagaagctgaaaattgaggtgaagatgatgatggacgaagcaacagatgagttggagcaactcgagcttatcaacgat  
ctgcaaaggcttggtatatacttaccacttcaaagatggcatagctaagatggtgaacaacattataagttagatagcaatacatggaaaa  
ggacttgacactcacagctctcaaatttagacttcttagacaacatggatctggttcctcaagatgttttagtagttcatggatgatgaagg  
aaatttcgaggcctgggtggtgaagacgtgtcagttcttctgtatctctgtatgaagcttcgacatatcagtggaaggggagagcatattggat  
atggcgaagatttctcatcgcatcatcttactgaaatggaggagcagattggtagggcgtgttagccgagcaagtgaagcgtagctgggag  
cttccactacactggagagttgggagacttgaagccagatggttcgtacaagcctacgagactagaccaactcaaaccactctggtgga  
gtagccaaactagatttcaacatggtacaagccaaataaccaggatgagcttaaacgctgttcaaggtggtatgaagaaactggcctacc  
gaaaagatgagtttccagacaccgattggcagagtggtttgtggtctctgggatttataccagatcctcatcatgggtattcgagggagat  
tatgaccaagattgcagtcttaattcagataacagatgacatatacgacatttatggagcgttagaagaactcaagagttcacagaggcatt  
cgagagatgggatcaattcattggatctcttccagaatacatgcaaatctgttcttagcaatcttcaactctgcaaatgaattgggtatc  
aaatttcgaggaccaaggcctcaatattatcccaaatctgaagagatcgtgggcagaattgagtagagcttactactagaagcaagatgg  
tttcaaacggatttgcctcaactacagatcagatctgaatactgcttggatttcatttcgggtcctctacttcttctatggctacctacca  
ccacgaatccataaacaacaaggaactgaagagcctagaaaacatcctagatcatccgttgccatccatggttcttgcacttcagat  
gatttgggaacttcatcagaagaatcaaaagaggggatgtctcgaatcaatccaatgctacatgaatgaaacaggatgctgcgagggg  
gatgcccgacatcacgtaaagagtttgattgaggtagcattgaagcgaatgaacgatgagatattgatggagaagccctcaagagtttca  
accaacgcatgaatcttgcacgaatctctctgcttctatcaatatggtgatggttcgggaagcccactctgataccatcaagaactg  
gtgtcactcattgttctacccttccatagccatga

Figure S8. Gene sequence of *LaBERS*

## Figure S9.

ggcagtttgacaagagaagacacagtcacccattttctgcaagtcaagaacgattaacaaatggccgaagccgaggatattcagcccctt  
gtctgtgacaatggaactggaatggcaaggctggatttctggagatgatgtccaagggccgtctccctagcattgttgggcgcctcgtc  
aactgggtgatggttggcatgggccaataaagatgcttatgttggtagcaggctcagccaagagaggtatattgacattgaagtatccga  
ttgagcacggaattgtcagcaactgggatgatatggagaaaatggcatcacattctacaatgagcttcgttagccccagaagagcac  
ccgattctttgacagaggctccttaatccaaggccaatcgtgagaagatgactcagatcatgtttgagaccttaatgcccctgcatgta  
tgttgctattcaggcagttctcactctatgcccagtggtcgtacaactggattgttctggactctggtgatggtgtgagtcacacagtccc  
ctacgaaggttatgcaactccctcatgcaatccttctgttctgatctggctgggctgatctcaccgactccctcatgaagatattgaccgagaga  
ggctactcattcaaccactgctgagcgggaaattgtgagggacatcaagagaagctggcttacattgactggactacgaacaggagc  
tggagacagcaaagaccagctccgctgtggagaagaactcgaactgcctgatggacaggtcatcactatcggctgctgagcgggtccgctg  
ccctgaggttctgttccagccatcaatgatcggaaatggaagctgctggaatccacgagaccacttaacattccatcatgaagtgtgatgctgat  
atcagaaaggatctgtacggaaacattgtcctcagtggtgggtcgaactatgttccccggtattgctgataggatgagcaaggagatcaccgct  
ctggctcccagcagcatgaagattaagtggtggctccgcccagaggaagtactctgtctggataggaggttccattttggcttctcagc  
accttcagcagatgtggattgccaaggcagagtagcagcaatctggcccgtcagatcgttcacagaaaatgcttcaaggaggagagcttgg  
gtgaagagagatttccctgctgttctgctcctgctcatttggtttctgttttagtttctggtgtattttactcctcctatgagcttttactttta  
gatttgatgaagcttggacatggtgacagacaatattcattttccaattttagaagagtttgtattataaaatattatgatttcagctttttt  
ttaatcaaaaa

**Figure S9. Sequence of housekeeping gene beta-actin**
